# Supplementary material
Source: PubMed Central journal article supplement (PMC3416057)
Supplement: EC.00099-12_zek999093944so1.pdf [file EC.00099-12_zek999093944so1.pdf]

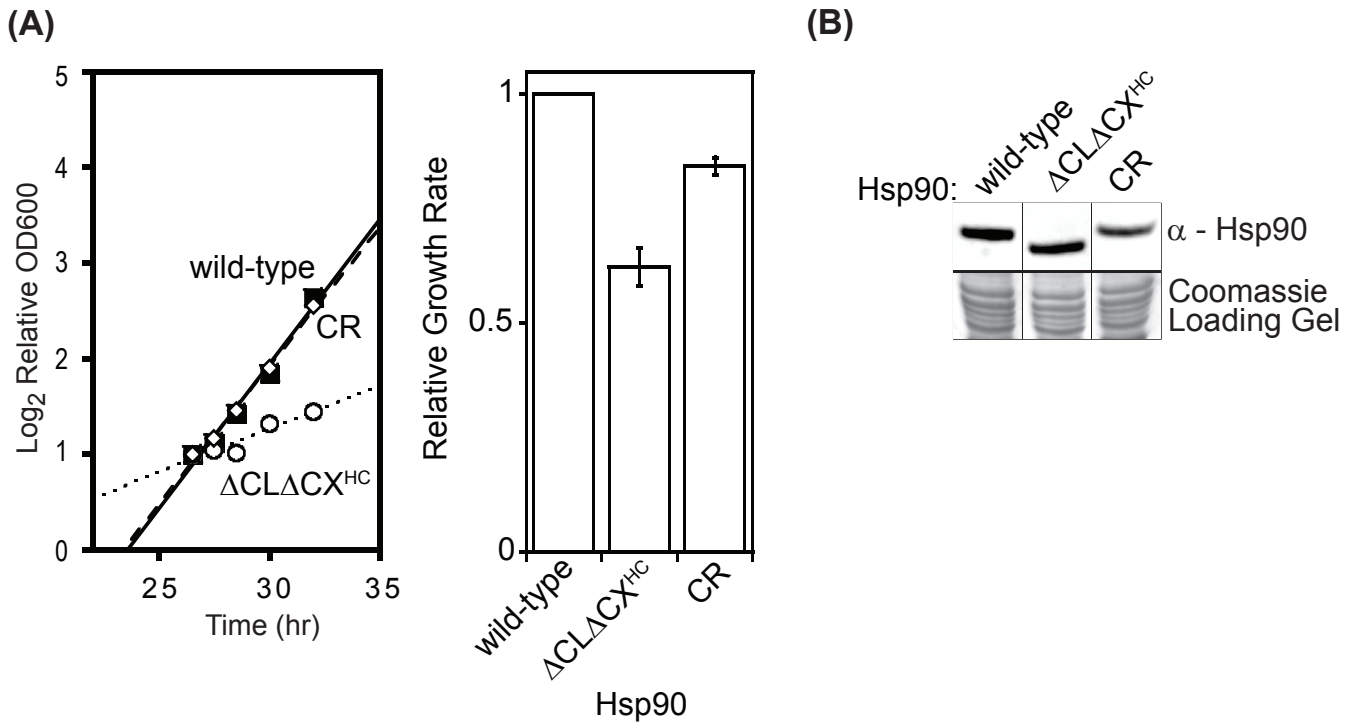

FIG. S1. At 36 °C, the rank order of growth rates for Hsp90 mutants was the same as at 37 °C but the magnitude of the growth defects was reduced. (A) Growth of  $\Delta\text{CL}\Delta\text{CX}^{\text{HC}}$  Hsp90 in liquid culture was impaired at 36 °C compared to wild-type Hsp90. Experiments were performed in triplicate (on the left is a representative experiment), and analyzed to determine the average growth effect and the variation between replicates. Error bars represent standard deviation,  $n=3$ . (B)  $\Delta\text{CL}\Delta\text{CX}^{\text{HC}}$  Hsp90 accumulated to wild-type levels at 36 °C based on western blotting of yeast lysates. Intervening lanes were removed for presentation purposes.
